# Supplementary material
Source: PubMed Central journal article supplement (PMC3276474)

**Supplemental figure 1. Summary of overlap extension PCR method.**

**Supplemental figure 2. Representative standard curve for PS-PLA<sub>1</sub> sandwich ELISA assay.**

(A) The standard curve plotting protein concentration (recombinant PS-PLA<sub>1</sub>) on the X axis, and assay measurement (OD450) on the Y axis. (B) The standard curve in the linear range.

**Supplemental figure 3. Michaelis-Menten curve for the determination of the apparent  $K_m$  and  $V_{max}$ .**

The Michaelis-Menten curves plotting substrate concentration (PS or LPS) on the X axis, and velocity on the Y axis.

Ex.) the construction of PS-PLA<sub>1</sub> with  $\beta$ 5 loop of PA-PLA<sub>1</sub> $\alpha$

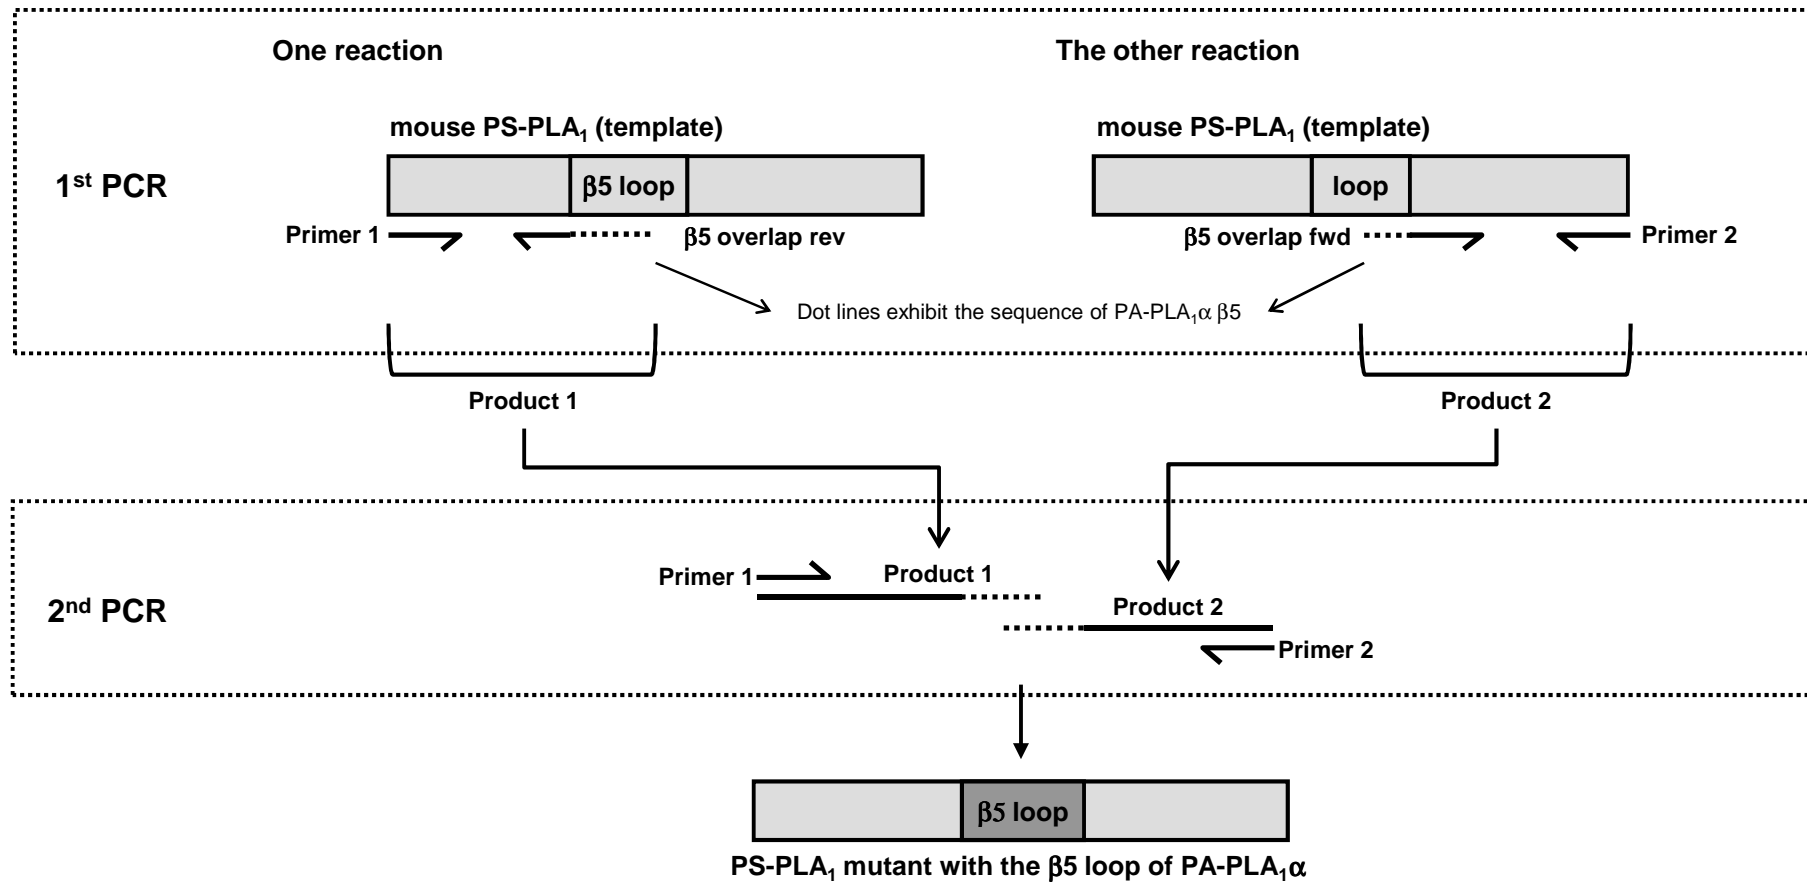

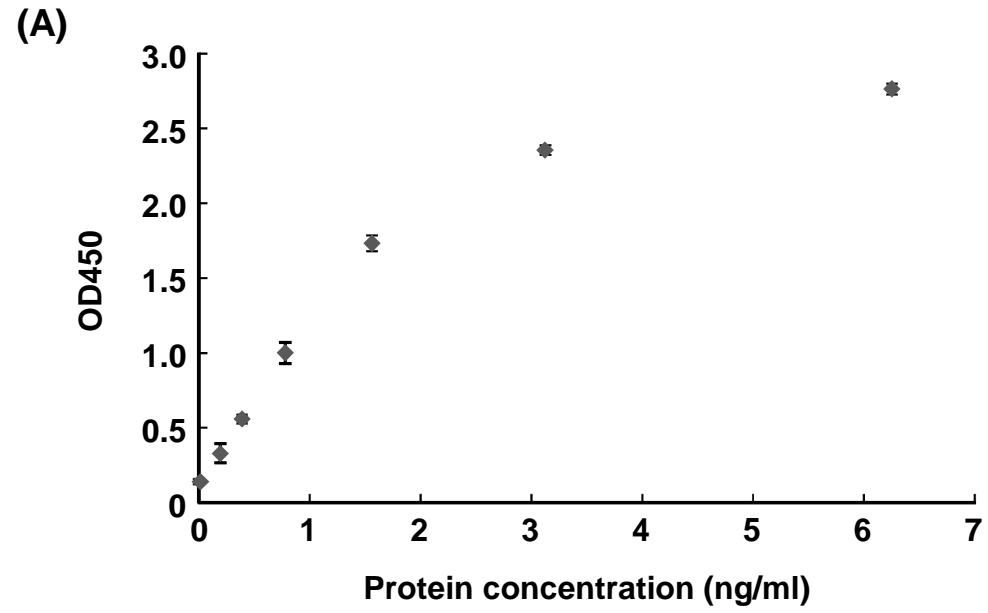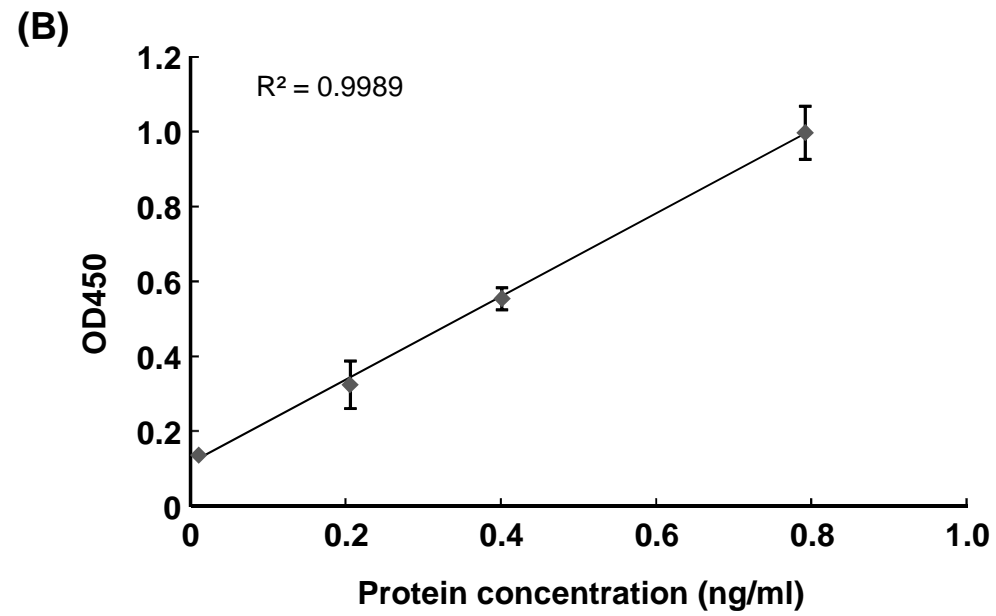

Arima et al. Supplemental figure 3

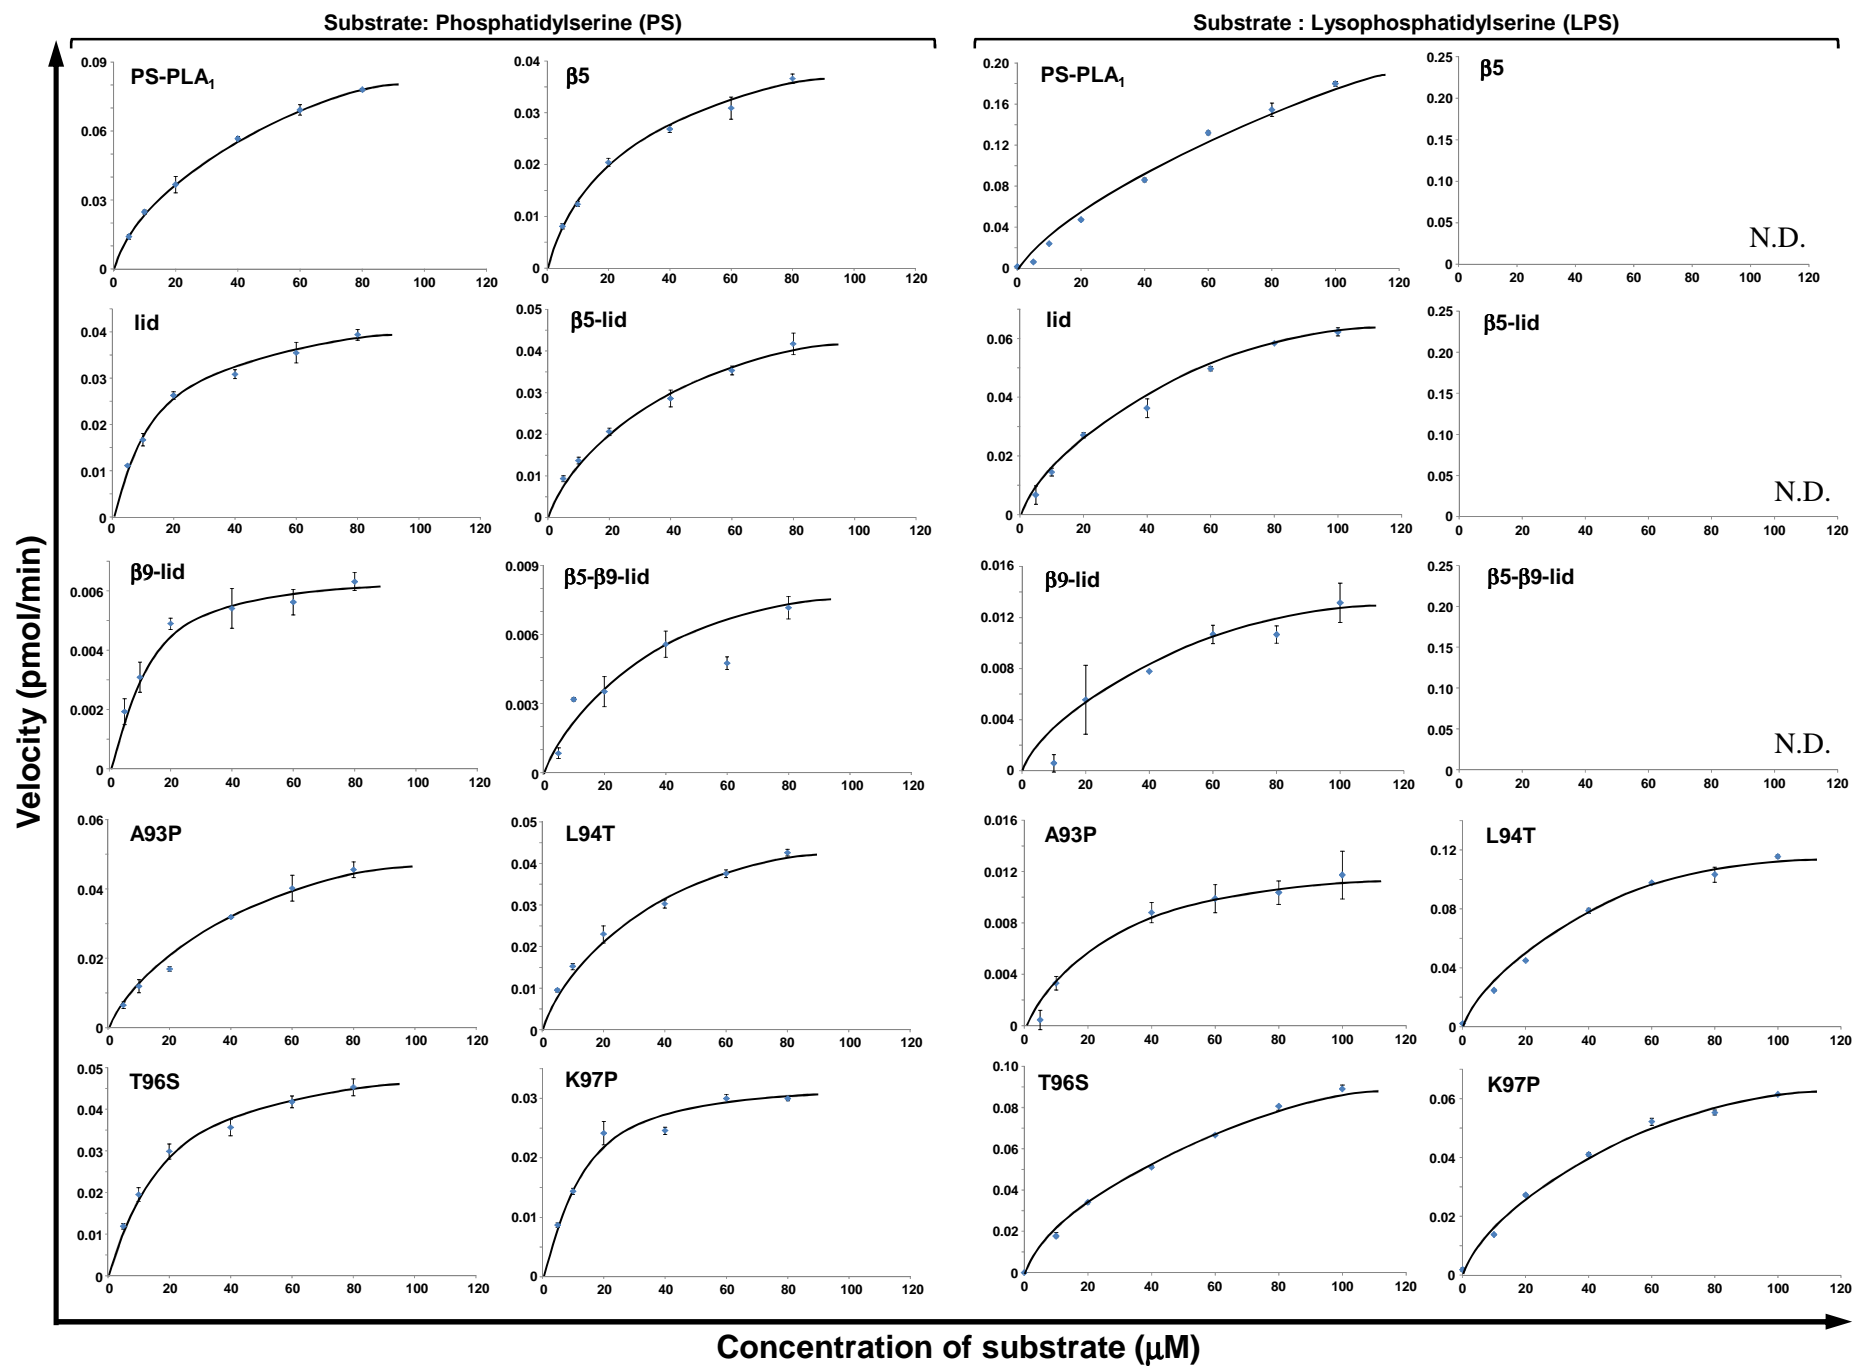

Supplement: supp_M022400_jlr.M022400-1.pdf [file supp_M022400_jlr.M022400-1.pdf]
